# 1 B-SIDER: Computational Algorithm for the Design 2 of Complementary $\beta$ -sheet Sequences

3

4 *Tae-Geun Yu<sup>1</sup>, Hak-Sung Kim<sup>1‡\*</sup>, and Yoonjoo Choi<sup>1‡\*</sup>*

5

6 <sup>1</sup>Department of Biological Sciences, Korea Advanced Institute of Science and Technology

7 (KAIST), Daejeon 34141, Republic of Korea

8 ‡These authors contributed equally.

9

10 \* Corresponding authors

11 Email: [yoonyoo.choi@kaist.ac.kr](mailto:yoonyoo.choi@kaist.ac.kr)

12 Email: [hskim76@kaist.ac.kr](mailto:hskim76@kaist.ac.kr)

13

14

## 15 **Abstract**

16 The  $\beta$ -sheet is an element of protein secondary structure, and intra-/inter-molecular  $\beta$ -sheet  
17 interactions play pivotal roles in biological regulatory processes including scaffolding,  
18 transporting, and oligomerization. In nature, a  $\beta$ -sheet formation is tightly regulated because  
19 dysregulated  $\beta$ -stacking often leads to severe diseases such as Alzheimer's, Parkinson's, systemic  
20 amyloidosis, or diabetes. Thus, the identification of intrinsic  $\beta$ -sheet forming propensities can  
21 provide valuable insight into protein designs for the development of novel therapeutics. However,  
22 structure-based design methods may not be generally applicable to such amyloidogenic peptides  
23 mainly owing to high structural plasticity and complexity. Therefore, an alternative design strategy  
24 based on complementary sequence information is of significant importance. Herein, we developed  
25 a database search method called B-SIDER for the design of complementary  $\beta$ -strands. This method  
26 makes use of the structural database information and generates query-specific score matrices. The  
27 discriminatory power of the B-SIDER score function was tested on representative amyloidogenic  
28 peptide substructures against a sequence-based score matrix (PASTA2.0) and two popular *ab initio*  
29 protein design score functions (Rosetta and FoldX). B-SIDER is able to distinguish wild-type  
30 amyloidogenic  $\beta$ -strands as favored interactions in a more consistent manner than other methods.  
31 B-SIDER was prospectively applied to the design of complementary  $\beta$ -strands for a splitGFP  
32 scaffold. Three variants were identified to have stronger interactions than the original sequence  
33 selected through a directed evolution, emitting higher fluorescence intensities. Our results indicate  
34 that B-SIDER can be applicable to the design of other  $\beta$ -strands, assisting in the development of  
35 therapeutics against disease-related amyloidogenic peptides.

## 36 **Introduction**

37 The  $\beta$ -sheet is one of the major units of protein structure <sup>1</sup>, and has a variety of functions in  
38 transportation, recognition, scaffolding, and enzymatic processes <sup>2</sup>. The mechanism of a  $\beta$ -sheet  
39 formation has recently received significant attention owing to its close relations with several  
40 critical diseases such as Alzheimer's, Parkinson's, type 2 diabetes, and systemic amyloidosis <sup>3,4</sup>.  
41 Such diseases are known to be linked to the precipitation of dysregulated  $\beta$ -stacking between  
42 neighboring  $\beta$ -strands <sup>5-7</sup>. In this regard, information on the amino acid propensity of intrinsic  $\beta$ -  
43 sheet forming motifs and its use in the design of their complementary sequences are crucial for  
44 understanding the mechanism of  $\beta$ -sheet formation and developing potential therapeutics  
45 specifically targeting aggregation-prone regions <sup>8</sup>.

46 Whereas structure-based protein design approaches have shown notable successes in several  
47 cases <sup>9</sup>, their application to *de novo*  $\beta$ -sheet designs still remains a challenge <sup>2,10</sup>. Although  
48 structure-based design approaches require a well-defined protein structure, amyloidogenic  
49 peptides usually have highly disordered structures <sup>11</sup>. The structural identification of such peptides  
50 has long been hindered by high degrees of structural plasticity, transiency, and complexity owing  
51 to a self-oligomerization <sup>12,13</sup>. It is thus necessary to exploit the complementarity across  
52 neighboring  $\beta$ -strand pairs using sequence information.

53 Intriguingly, significant conservation and covariations of residue pairs between neighboring  $\beta$ -  
54 strands have been identified in many different protein families <sup>14</sup>. For instance, pairs of  $\beta$ -branched  
55 residues and cysteines are preferred at nonhydrogen-bonded positions. Aromatic residues tend to  
56 be paired with valine or glycine <sup>15</sup>. Several computational algorithms have been developed to  
57 predict aggregation-prone regions based on the internal  $\beta$ -sheet forming patterns. While differing  
58 in detail, they make use of either statistical potentials such as Tango <sup>16</sup>, PASTA <sup>17</sup>, SALSA <sup>18</sup>,

59 BETASCAN<sup>19</sup>, and Waltz<sup>20</sup> or physicochemical properties of amino acids<sup>21</sup>. In addition,  
60 consensus methods and machine-learning approaches have also been developed<sup>22,23</sup>, showing fine  
61 agreement with the experiment results.

62 It has been reported that  $\beta$ -strand interactions can be stabilized by introducing  $\beta$ -sheet favored  
63 pairs<sup>24-28</sup> and charge pairing between neighboring  $\beta$ -strands<sup>29-31</sup>. Recent studies have shown that  
64 fragments derived from the amyloidogenic region can be used for  $\beta$ -stack modeling<sup>6,32</sup>. While the  
65 use of amino acid pairing information in a protein design has been attempted elsewhere, practical  
66 applications of such patterns have been limited, mainly owing to the lack of a comprehensive  
67 quantification for residue pairing and noisy patterns of  $\beta$ -sheet forming residue pairs<sup>1,33,34</sup>. The  
68  $\beta$ -sheet forming peptides appear to have poor sequence commonalities and imperfect repeats<sup>19</sup>.  
69 Therefore, a careful curation of meaningful patterns is required for a practical protein design  
70 strategy of complementary  $\beta$ -strands.

71 Herein, we present a database search method, B-SIDER ( $\beta$ -Stacking Interaction DEsign for  
72 Reciprocity), for the design of complementary  $\beta$ -strands. The method generates a query-specific  
73 score matrix from the structure database. To utilize the pairing information and overcome the  
74 pattern noise, we hypothesized that significant complementary pairs can be amplified by  
75 superposing a subset of sequence fragments. Moreover, the recent growth boom of  $\beta$ -sheet  
76 structures<sup>35</sup> allows the solid statistics of  $\beta$ -sheet forming residue pairings<sup>36</sup>. Based on the  
77 hypothesis and statistics of  $\beta$ -sheet forming residue pairings, we developed a fast and reliable  
78 computational method for the design of complementary  $\beta$ -strand sequences. The methodology  
79 augments  $\beta$ -sheet forming residue preferences by overlaying complementary fragment sequences  
80 (**Figure 1**). We retrospectively validated our approach using a set of curated amyloidogenic targets  
81 and compared it with two popularly used structure-based methods (Rosetta and FoldX) and a

82 sequence-based aggregation prediction algorithm (PASTA 2.0). Our algorithm was shown to  
83 clearly distinguish favorable  $\beta$ -sheet forming sequences entirely based on the query sequence,  
84 whereas the structure-based energy functions exhibited inconsistent results depending on the  
85 targets. The utility and potential of our method were demonstrated by designing novel  
86 complementary peptides for splitGFP. The designed sequences showed stronger interactions with  
87 neighboring strands of the scaffold, and consequently higher fluorescence emissions, than the  
88 original peptide selected through directed mutagenesis <sup>37</sup>.

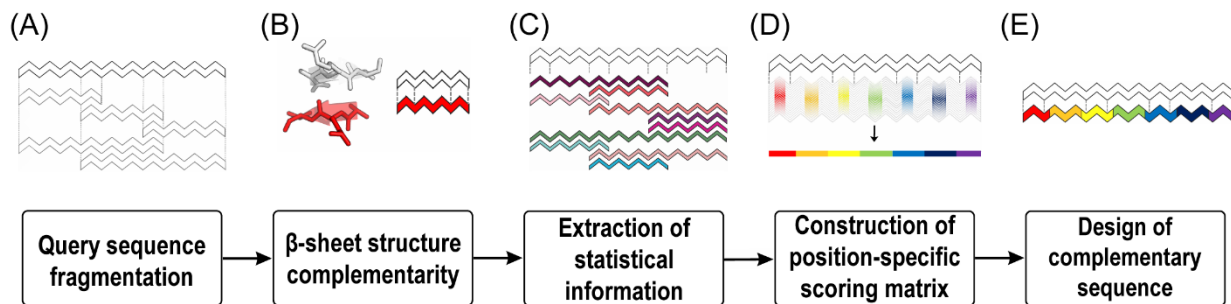

89 **Figure 1. Overview of the B-SIDER algorithm.** (A) When a query sequence is given, the query  
90 is divided into smaller linear peptides ranging from three residues to its full length. (B) Exactly  
91 matched sequences are identified and checked against the structure database such that the matches  
92 indeed form  $\beta$ -sheets. (C) If the matches form  $\beta$ -sheets, their complementary sequences are  
93 extracted. (D) A position-specific score matrix is constructed based on the complementary  
94 sequence information. (E) Final complementary sequences are designed using the score matrix.

95

96

97

## 98 **Materials and Methods**

### 99 **Computational algorithm for the design of complementary sequences**

100 **Collection of  $\beta$ -strand information** Non-redundant structures determined by high-resolution X-  
101 ray crystallography were collected from the PISCES<sup>38</sup> (10~90% sequence identity), < 3 Å  
102 resolution, < 0.3 R-factor and sequence length from 40 to 10000. Given the query target sequence,  
103 the non-redundant structure database was used to extract pairing information from matched  
104 sequences with the same directionality. The target sequence is initially divided into linear moving-  
105 windows whose residues in length range from 3 to the entire target-sequence length. Any structures  
106 with identical target sequence fragments as the split queries were collected, followed by further  
107 filtering based on the definition of  $\beta$ -sheet secondary structure (the distance between the backbone  
108 nitrogen-oxygen atom pairs < 5 Å). To remove any redundancy, protein structures that contain  
109 matches were compared using TMalign<sup>39</sup>. If the TM-score > 0.7 and sequence identity > 90%,  
110 one of the matched sequences is removed.

111 While the method is applicable to both parallel and anti-parallel  $\beta$ -sheets in theory, we  
112 entirely focused on anti-parallel  $\beta$ -sheets in this study<sup>27,28</sup> and all the test cases are anti-parallel  
113 because anti-parallel cases are more frequently observed compared to parallel cases<sup>40</sup>. Disease-  
114 related amyloidogenesis is also known to be initiated with anti-parallel  $\beta$ -sheets, and soluble  
115 oligomeric amyloid species mainly exist as anti-parallel<sup>41,42</sup>.

116

117 **Complementary sequence score** The  $\beta$ -sheet complementarity score function is derived from the  
118 environment-specific substitution score<sup>43</sup>. We hypothesized that each position of a  $\beta$ -strand is  
119 independent of one another, and their complementarities are determined through residue pairs from

120 neighboring strands. Given the query sequence, all identified neighboring sequences are pooled  
121 together, as described in the previous section. The amino acid frequency at each complementary  
122 position is counted as

$$A_{i,p} = O_{i,p} / \sum_i O_{i,p}. \quad (1)$$

123 where  $A_{i,p}$  is the frequency of a certain amino acid ( $i$ ) at a specific complementary position ( $p$ ), and  
124  $O_{i,p}$  is the total count of the amino acid at  $p$ . The background frequency of a certain amino acid  $B_i$   
125 is independent of the query and thus counted from a well defined structure database(HOMSTRAD  
126 database <sup>44</sup>). The frequency is calculated as

$$B_i = \sum_p O_{i,p} / \sum_{i,p} O_{i,p}. \quad (2)$$

127 The complementary sequence score of the amino acid at the position  $S_{i,p}$  is calculated as

$$S_{i,p} = -\log(A_{i,p}/B_i). \quad (3)$$

128 It should be noted that the complementarity score is completely data-driven, i.e., if an  
129 amino acid never appears at a certain position, a high penalty score is imposed. We only consider  
130 complementary amino acids that are found at least once in the entire identified sequences. The  
131 final score is the sum of the scores at all positions.

132

### 133 **Protein expression and complementation assay**

134 **Gene construction** The gene coding for splitGFP <sup>37</sup> consists of the first through tenth (GFP1-10)  
135 and 11<sup>th</sup> strand (GFP11) templates (Supporting Information, **Table S1**). They were cloned into  
136 pET-28a (Novagen) vector between the Nde-I and Xho-I restriction sites. We introduced additional  
137 mutations to GFP1-10 to inhibit aggregation and for a convenient expression <sup>45</sup>. The GFP11 strand

138 was fused with a P22 virus-like particle scaffolding protein<sup>46</sup> for a soluble and stable expression.  
139 Mutations on GFP11 were introduced through PCR using mutagenic primers (Supporting  
140 Information, **Table S2**), and the resulting genes were cloned into the pET-28a vector. Six histidine  
141 residues were fused to the N-terminal of the GFP1-10 and GFP11 genes as an affinity purification  
142 tag.

143

144 **Protein expression and purification** All constructs were transformed into BL21 (DE3)  
145 Escherichia coli strains. The transformed cells were grown overnight and inoculated into a Luria-  
146 Bertani media containing 50 µg/ml of kanamycin at 37 °C. The cells were then grown until the  
147 optical density of the cells reached 0.6–0.8 at 600 nm, followed by the addition of 0.7 mM of IPTG  
148 (isopropyl β-D-1-thiogalactopyranoside) for induction. After incubation for 16–18 h at 18 °C, the  
149 cells were harvested and suspended in a lysis buffer containing 50 mM Tris (pH 8.0), 150 mM  
150 NaCl, and 5 mM imidazole. The suspended cells were disrupted through sonication, and insoluble  
151 fractions were removed using centrifugation at 18,000 g for 1 h. The supernatants were filtered  
152 with 0.22 µm syringe filters and purified through affinity chromatography using Ni-NTA agarose  
153 Superflow (Qiagen). The solutions were applied to the resin-packed columns and washed with a  
154 buffer containing 50 mM Tris (pH 8.0), 150 mM NaCl, and 10 mM imidazole, until no proteins  
155 were detected through a Bradford assay. An elution buffer (50 mM Tris (pH 7.4), 150 mM NaCl,  
156 300 mM imidazole) was then applied to the column. The buffer exchange was performed with  
157 phosphate buffered saline (PBS, pH 7.4) using a PD-10 column (GE health-care). The  
158 concentrations of the proteins were determined by measuring the absorbance at 280 nm. All  
159 purification processes were conducted at 4 °C. The purities of the proteins were then evaluated  
160 using SDS-PAGE.



161

162 **Complementation assay** The assembly of splitGFP variants was monitored and measured using  
163 a fluorescence complementation assay. An excessive amount of GFP1-10 (50 pmol) in 180  $\mu$ l and  
164 20  $\mu$ l of equal molar concentration for each GFP 11 strand (3 pmol) were co-incubated in a PBS  
165 buffer (pH 7.4). The fluorescence kinetics ( $\lambda_{\text{ex}} = 488 \text{ nm}$  /  $\lambda_{\text{em}} = 530 \text{ nm}$ ) were monitored for 12 h  
166 at 25 °C using a TECAN infinite M200 microplate reader at 5 min intervals <sup>37</sup> with shaking for 2  
167 sec between intervals. Each experiment was conducted in triplicate using a Nunc F 96 Micro-well  
168 black plate, blocked with a solution of PBS containing 0.5 % of bovine serum albumin (BSA) for  
169 30 min before the assay.

170

## 171 **Results/Discussion**

### 172 **Overview of the design process**

173 We hypothesized that repetitively observed amino acid pairing patterns indicate a strong  
174 preference toward the  $\beta$ -sheet. It was also assumed that the sequence with the most frequent  
175 patterns will directly form a  $\beta$ -sheet without considering other environmental contributions.

176 There are two major steps applied in the algorithm: 1) The extraction of complementarity  
177 information of the  $\beta$ -sheet and 2) the construction of a scoring matrix (**Figure 1**). When a query  
178 sequence is given, it is fragmented into several pieces of short peptides longer than three residues  
179 in length, and the matching neighboring strands are collected. These fragmentation and overlaying  
180 processes naturally impose weights on complementary-prone positions and amplify the pattern  
181 signals. It should be noted that the subsequence search starts from the -2<sup>nd</sup> position in order to  
182 avoid underweighting terminal regions (Supporting Information, **Figure S1**). After the collection

183 of matched sequences, a position-specific complementarity scoring matrix is constructed. The  
184 scoring matrix obtained is used to evaluate and design the complementarity of  $\beta$ -strand interactions.

### 185 **Validation of the score function on retrospective cases**

186 In an effort to validate the complementarity score, we manually curated a test set of  
187 naturally occurring  $\beta$ -strand pairs whose environmental effects are minimal. It is known that  $\beta$ -  
188 strand pairing is in general significantly hindered by local environments<sup>47</sup>, whereas amyloidogenic  
189 peptide segments are known to form natural  $\beta$ -sheets themselves<sup>17</sup>. We thus selected a set of  
190 widely known amyloidogenic structures whose aggregation-prone regions have been identified  
191 (**Table 1** and Supporting Information, **Table S3**). When multiple  $\beta$ -strands are present, we assumed  
192 that the first strands may be the primary amyloid building unit and so only the first two strands as  
193 a pair were extracted for the structure-based energy calculation.

194 **Table 1. Retrospective test set**

| Source                   | PDB ID                 |
|--------------------------|------------------------|
| Amyloid- $\beta$         | 2lnq, 2y2a, 2y3l, 3pzz |
| Insulin                  | 2omq                   |
| IAPP(amylin)             | 3fth, 5e6l             |
| Prion                    | 3md4, 3nve             |
| Tau                      | 4e0m                   |
| $\beta$ -2 microglobulin | 3loz, 4e0k, 4e0l       |
| Immunoglobulin           | 6dj0, 6dix             |
| SOD1                     | 5wor                   |

195

196 To assess the complementarity of the native sequences, we compared their scores with  
197 those of random sequences which were generated using all 20 amino acids in a position-  
198 independent manner. Natural amyloidogenic segments are known to be highly prone to

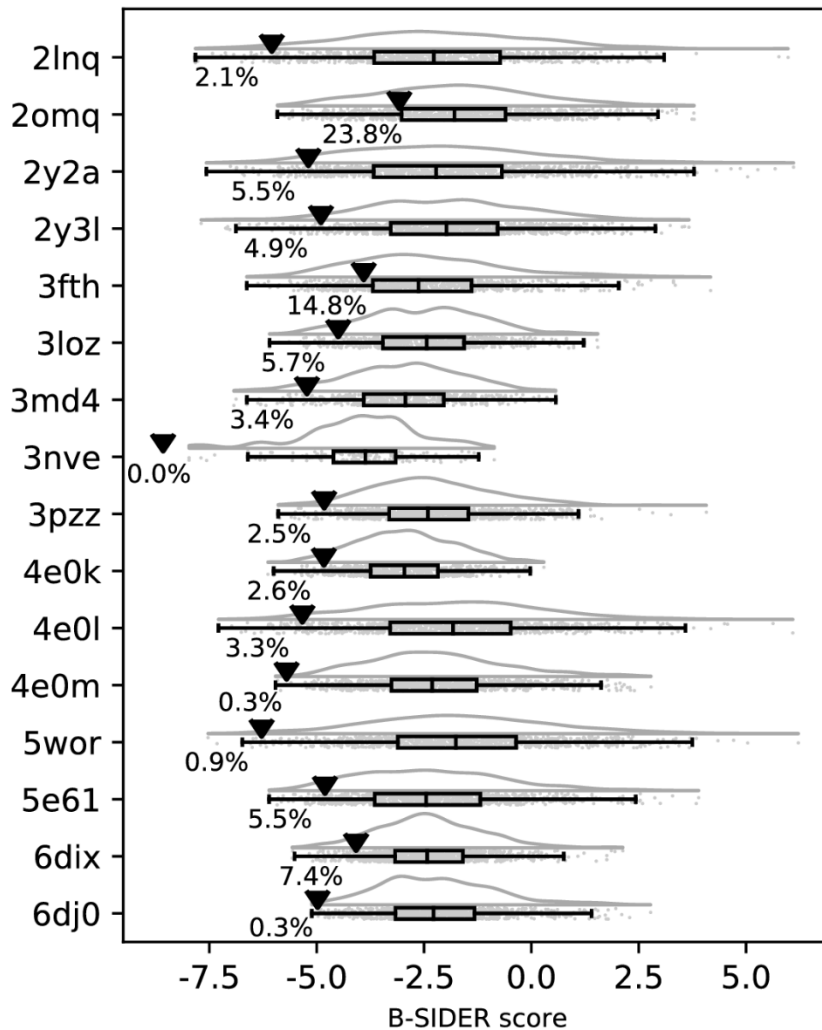

199 aggregation, and thus they are expected to be highly preferred, i.e., having fairly low scores in the  
200 random sequence score distributions. **Figure 2** shows that all native sequence scores are ranked  
201 extremely low in all distributions. On average, the native sequences are within 5.2% of the  
202 distributions (**Figure 2**). The results indicate that the scoring function is extremely useful in  
203 detecting favorable  $\beta$ -strand counterparts.

204 **Figure 2. The predictive power of the B-SIDER score.** In this test set, native sequences were  
205 compared against 1,000 random sequences. A lower score indicates more favorability. The native  
206 complementarity scores are marked as (▼) and their percentile values are displayed next to the  
207 marks. This plot was generated using the Raincloud Python package <sup>48</sup>.

208

209 We also compared the B-SIDER score with two structure-based all-atom energy functions  
210 and a sequence-based score matrix. For the structure-based methods, we picked Rosetta (Talaris  
211 13) <sup>49, 50</sup> and FoldX <sup>51</sup>, which have been popularly used in *de novo* protein designs <sup>52, 53</sup>. PASTA  
212 2.0 <sup>54</sup> is a method for predicting regions prone to aggregation using a scoring matrix derived from  
213 residue pairing patterns of  $\beta$ -sheets. To avoid any biases, 1,000 random sequences were newly  
214 prepared per target. The “FastRelax” protocol <sup>55</sup> from Rosetta (Ver. 3.7), the “BuildModel”  
215 command from FoldX (Ver. 4.0), and the scoring matrix from PASTA 2.0 were used against the  
216 native and random sequences. The predictive power of the score function was assessed based on  
217 the percentile of the native sequence score against the random sequence score distribution.

218 **Figure 3A** shows that structure-based score functions are generally worse than the  
219 sequence-based scoring matrices. The results indicate that the Rosetta energy score function is not  
220 sufficiently accurate for ranking complementary  $\beta$ -strands (35.1<sup>th</sup> percentile on average), whereas  
221 the predictive powers of PASTA 2.0 and FoldX were moderate, showing 7.4<sup>th</sup> and 16.4<sup>th</sup>  
222 percentiles on average respectively. B-SIDER was shown to be the most accurate in an extremely  
223 consistent manner (5.2<sup>th</sup> on average. Standard deviations of Rosetta, FoldX, PASTA 2.0 and B-  
224 SIDER are 25.2, 23.3, 8.7 and 6.2, respectively). Although the assessment by PASTA 2.0 is also  
225 fairly consistent, the query-specific nature of B-SIDER may provide better results.

226

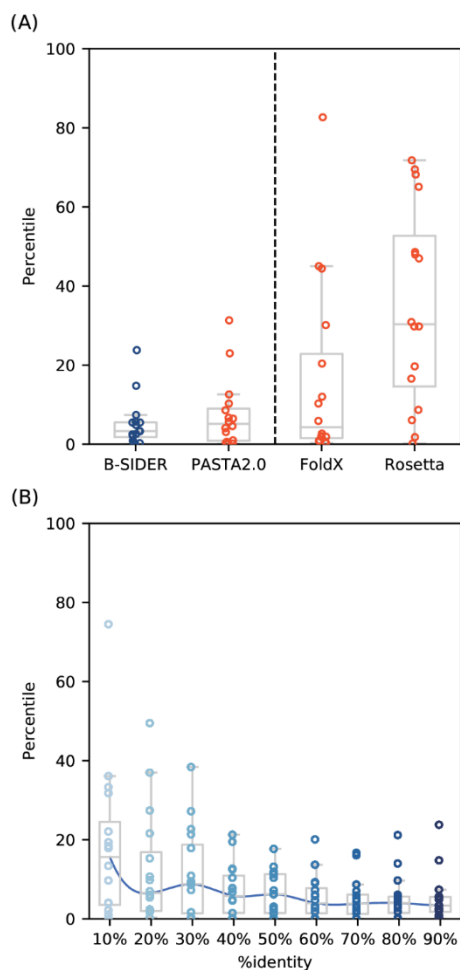

227 **Figure 3. Predictive power of B-SIDER score and its robustness.** (A) The B-SIDER score is  
228 compared against two popularly used structure-based protein design methods (Rosetta and FoldX)  
229 and the scoring matrix for the prediction of an amyloid formation (PASTA 2.0). For a fair  
230 comparison, we generated new sets of 1,000 random sequences per target and assessed their scores  
231 using each energy function. The percentile values of native complementary sequences against the  
232 score distributions of the randomly generated sequences are presented. The B-SIDER score  
233 provided the most consistent assessment. (B) The robustness of the B-SIDER score was evaluated  
234 at various sequence identity threshold values. The percentile values of B-SIDER are overall fairly  
235 consistent at even low sequence identity cutoff.

236

237           Considering that the Rosetta relax protocol performs flexible backbone refinements, the  
238 use of a fixed-backbone calculation seems to be better for an evaluation of the  $\beta$ -sheet  
239 complementarity. It should be noted that the inconsistent results of Rosetta imply that FoldX  
240 prediction will also be highly driven by the preparation of the structure, i.e., a design with an ill-  
241 defined model may not be generally successful. By contrast, B-SIDER and PASTA 2.0 do not  
242 require any structure at all, and thus can be applied to general cases such as  $\beta$ -sheet interactions  
243 with high structural plasticity and poor structural integrity, which are the common features of  
244 amyloidogenic peptides. Furthermore, the process of collecting complementary motifs of B-  
245 SIDER also appears to be powerful, making it possible to distinguish favorable complementary  
246 sequences not easily detected through one-to-one residue pairing. We also tested the robustness of  
247 the B-SIDER approach by examining the algorithm at various sequence identity cutoff values of  
248 the structure database. The results are fairly consistent until  $< 40\%$  sequence identity cutoff  
249 (**Figure 3B** and Supporting Information, **Figure S2**). We observe that significant outliers start  
250 appearing at  $< 30\%$ . Despite such outliers, B-SIDER still successfully discriminates most test cases  
251 as favorable. The length distributions of matched subsequences (**Figure S3**) show that  
252 complementarity information is mainly derived from subsequences with the minimal length.  
253 Perhaps the consistency of the predictive power at low homology thresholds may come from the  
254 subsequence overlapping.

### 255 **Prospective application of the algorithm to splitGFP**

256           As shown in the retrospective test, B-SIDER is extremely useful in discriminating naturally  
257  $\beta$ -strand forming sequences. As a proof of concept, we prospectively designed novel  
258 complementary  $\beta$ -strands for splitGFP. SplitGFP is a fragmented protein pair derived from

259 superfolderGFP<sup>37</sup>, comprising a scaffold containing ten  $\beta$ -strands (GFP1-10) and their  
260 complementary  $\beta$ -strand peptide (GFP11). GFP11 specifically interacts with GFP1-10, and the  
261 strand tightly forms a stable  $\beta$ -sheet structure, which facilitates the chromophore maturation in an  
262 irreversible manner<sup>56</sup>. This assembly process results in the emission of green fluorescence.  
263 Because GFP11 is known to be disordered in a solution, its conformational transition from a  
264 disordered to an induced  $\beta$ -sheet is similar to that of amyloidogenic peptides<sup>57, 58</sup>. This model  
265 system thus efficiently assesses whether sequences designed using B-SIDER have favorable  $\beta$ -  
266 sheet interactions.

267 **Table 2.** GFP 11 variants

| Variant   | Sequence                                    | Score  | Relative Assembly* |
|-----------|---------------------------------------------|--------|--------------------|
| top_var1  | M <u>V</u> L <u>V</u> E <u>F</u> V <u>T</u> | -12.34 | 1.17               |
| top_var2  | M <u>Y</u> L <u>V</u> E <u>F</u> V <u>T</u> | -12.14 | 1.4                |
| top_var9  | M <u>T</u> L <u>V</u> E <u>F</u> V <u>T</u> | -11.79 | 1.36               |
| top_var3  | M <u>V</u> L <u>V</u> E <u>I</u> V <u>T</u> | -12.11 | 0.59               |
| top_var4  | M <u>V</u> L <u>V</u> E <u>F</u> V <u>Y</u> | -11.95 | 0.56               |
| top_var5  | M <u>Y</u> L <u>V</u> E <u>I</u> V <u>T</u> | -11.92 | 0.88               |
| top_var6  | M <u>V</u> L <u>V</u> E <u>V</u> V <u>T</u> | -11.90 | N.D.               |
| top_var7  | M <u>V</u> L <u>V</u> E <u>F</u> V <u>V</u> | -11.89 | N.D.               |
| top_var8  | M <u>V</u> L <u>V</u> E <u>F</u> V <u>W</u> | -11.83 | N.D.               |
| top_var10 | M <u>V</u> L <u>V</u> E <u>F</u> V <u>F</u> | -11.77 | N.D.               |
| neg_var   | M <u>V</u> L <u>G</u> E <u>K</u> V <u>E</u> | -4.60  | 0.04               |
| Ori       | MVLHEYVN                                    | -6.50  | 1                  |

268 \*Normalized values compared to the fluorescence level of the original GFP11 strand.

269

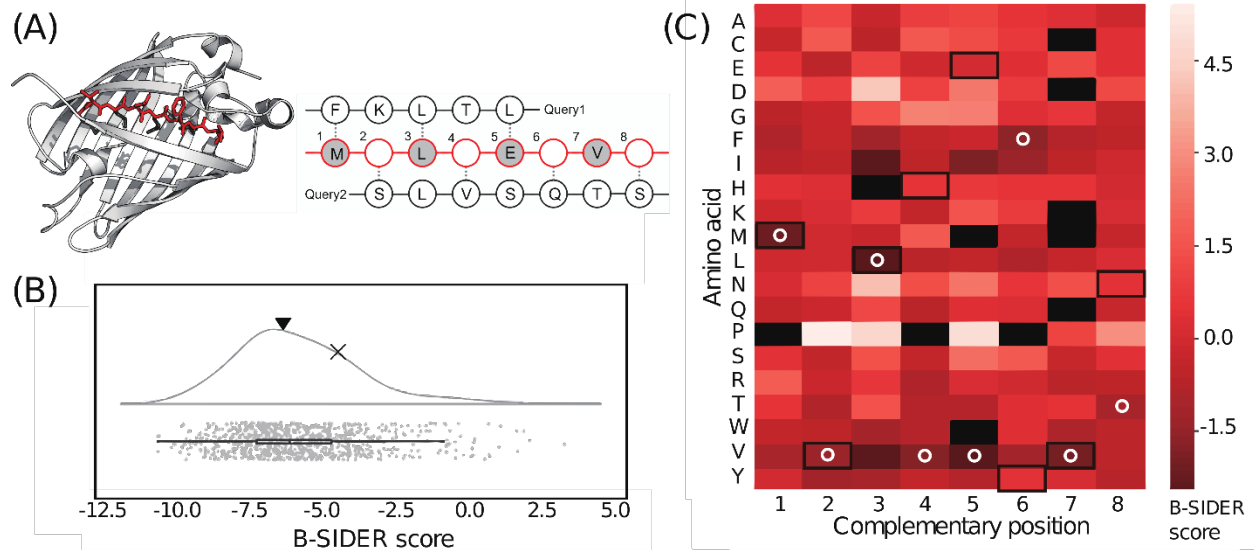

**Figure 4. Design process of GFP11 variants.** (A) The strand to be designed (GFP11) is highlighted in red, and query sequences to consider are shown on the right. Dotted lines represent hydrogen bonds. The residues pointing inward, which are not subject to a mutation, are colored in gray. (B) The B-SIDER score of the original GFP11 (▼) is compared against the score distribution of randomly generated sequences. The negative variant (neg\_var) is marked as × (the 77<sup>th</sup> percentile). (C) The position-specific scoring matrix for the query sequences. Amino acids that never appeared at each position are colored in black. The amino acids of the native sequence are highlighted with black boxes. The white circles represent the lowest scores at each position.

270           The original GFP11 was designed using directed mutagenesis, and it shows a high intrinsic  
271 propensity to form hydrogen bonds with the neighboring  $\beta$ -strands of GFP1-10<sup>59</sup>. In our case, the  
272 queries are the neighboring strands of GFP1-10 (**Figure 4A**). The total score was calculated as a  
273 sum of the scores from both sides without specific weights. It is known that the inward pointing  
274 residues (1, 3, 5, and 7<sup>th</sup> positions) directly interact with the chromophore, and thus are not subject  
275 to a mutation. It should be noted that we utilized the best structure data available (PDB < 90 %



276 sequence identity). B-SIDER identified 2,637 non-redundant sequences from the structure  
277 database. The native sequence is ranked modestly among 1,000 possible randomly chosen  
278 sequence variants (46<sup>th</sup> percentile), indicating that there could be room for complementary  
279 sequences with stronger interactions than the original (**Figure 4B**). We then selected sequences  
280 with the lowest B-SIDER scores (top\_vars; **Table2**). Amino acid compositions of the ten variants  
281 are mostly hydrophobic or branched amino acids (Supporting Information, **Figure S4**). In addition,  
282 one sequence with a high score (> 75<sup>th</sup> percentile) was randomly selected as a negative control  
283 (neg\_var, 77<sup>th</sup>).

284 The selected variants were successfully expressed and purified (Supporting Information,  
285 **Figure S5**) except for four clones (top\_var6, 7, 8, and 10), which were observed to be insoluble,  
286 perhaps due to aggregation. Among those expressed, three variants (top\_var1, 2, and 9) showed  
287 faster assembly patterns and higher signals compared to the original GFP11 (**Figure 5**). No  
288 functional aberrance with excitations or emissions was observed (Supporting Information, **Figure**  
289 **S6**). All successful variants, which emitted stronger fluorescence levels than the original, were  
290 shown to have pairs of phenylalanine and threonine at positions 6 and 8, respectively. These results  
291 demonstrate that the designed variants indeed formed complementary  $\beta$ -strands in a more  
292 favorable fashion than the original peptide as predicted. The other variants showed slightly lower  
293 signals than the original, but still gave rise to clear fluorescence signals (**Figure 5**). The negative  
294 control (neg\_var) barely emitted any signal, suggesting that the score indeed indicates the  
295 complementarity of the  $\beta$ -stacking interactions. We also assigned scores to the GFP11 variants  
296 using other scoring methods. As shown in the retrospective test set, Rosetta and FoldX were unable  
297 to discriminate top\_vars as favorable (Supporting Information, **Figure S7**). However, PASTA 2.0  
298 was again fairly accurate in this case.

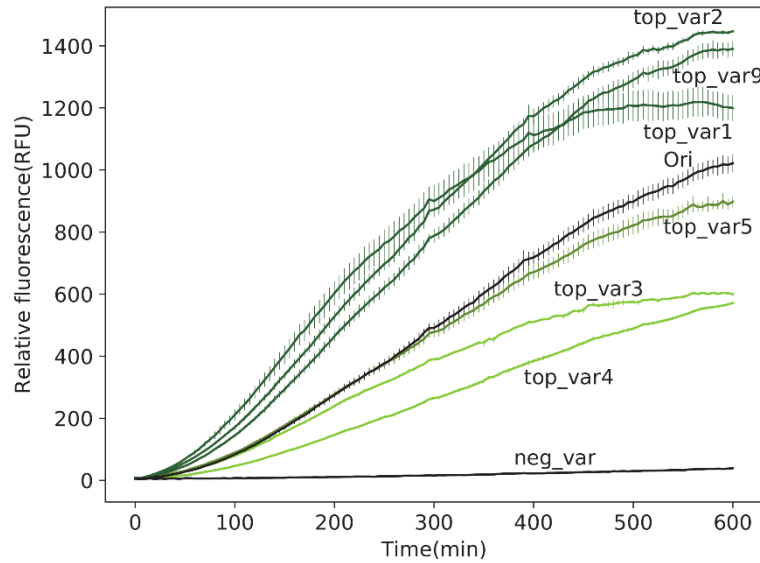

299

300 **Figure 5. Complementation assay with the designed GFP11 variants.** Among the six  
301 successfully expressed variants, three variants exhibited stronger fluorescence emissions than the  
302 original peptide identified through a directed mutagenesis.

303

## 304 **Conclusion**

305 For understanding the aggregation mechanism of disease-related  $\beta$ -sheets and developing  
306 potential therapeutics against them,  $\beta$ -sheet forming patterns are essential. Unlike  $\alpha$ -helices,  
307 however, there has been no established design principle for the complementarity of  $\beta$ -sheets. In  
308 this study, we developed B-SIDER, a database search method for the design of complementary  $\beta$ -  
309 strands based on the intrinsic  $\beta$ -sheet forming propensities. Statistical patterns of interacting  
310 residue pairs between neighboring  $\beta$ -strands enable the complementary interaction to be quantified.  
311 We demonstrated that the statistical potential can be directly applied to the design of  
312 complementary  $\beta$ -strand sequences. Using splitGFP as a model system, we successfully designed  
313 fragment variants, which led to stronger fluorescence emissions than the native one originally

314 identified through a directed mutagenesis. The results clearly indicate that B-SIDER can be useful  
315 for the detection and design of  $\beta$ -stacking interactions between unstructured fragments. Therefore,  
316 our approach can find wide applications in protein designs where structure-based methods are  
317 ineffective, including the development of protein binders specifically against intrinsically  
318 disordered disease-related proteins.

319

## 320 **Notes**

321 B-SIDER is freely available at <http://bel.kaist.ac.kr/research/B-SIDER>

322

## 323 **Supporting Information**

324 Supporting Information Available: Sequences of GFP constructs (Table S1 and S2), identification  
325 of query sequences of the retrospective test set (Table S3), schematic description of B-SIDER  
326 scoring (Figure S1), discriminatory power of B-SIDER scoring at various sequence identity cutoff  
327 values (Figure S2), length distribution of matched subsequences (Figure S3), sequence logo of  
328 GFP11 variants (Figure S4), SDS-PAGE analysis of GFP11 variants (Figure S5),  
329 excitation/emission spectral analyses of GFP11 variants (Figure S6), score reassessment of the  
330 GFP11 variants using PASTA2.0, FoldX and Rosetta (Figure S7).

331 This material is available free of charge via the Internet at <http://pubs.acs.org>

332

## 333 **Acknowledgements**

334 This work was conducted using Alphacom high-performance computing cluster at the  
335 department of biological sciences at the Korea Advanced Institute of Science and Technology  
336 (KAIST).

337 This work was supported by the Korea Research Fellowship Program (2016H1D3A1938246 to  
338 Y.C.), Global Research Laboratory (NRF-2015K1A1A2033346), and Mid-Career Researcher  
339 Program (NRF-2017R1A2A1A05001091) of the National Research Foundation (NRF) funded by  
340 the Ministry of Science and ICT.

## 341 **Abbreviations**

342 GFP, green fluorescent protein; PCR, polymerase chain reaction; IPTG, isopropyl  $\beta$ -D-1-  
343 thiogalactopyranoside; BSA, bovine serum albumin; IAPP, islet amyloid polypeptide precursor;  
344 SOD1, superoxide dismutase 1; PDB, protein data bank

## 345 **References**

- 346 1. Bhattacharjee, N.; Biswas, P., Position-Specific Propensities of Amino Acids in the  $\beta$ -  
347 strand. *BMC Struct. Biol.* **2010**, 10, 29.
- 348 2. Marcos, E.; Chidyausiku, T. M.; McShan, A. C.; Evangelidis, T.; Nerli, S.; Carter, L.;  
349 Nivón, L. G.; Davis, A.; Oberdorfer, G.; Tripsianes, K.; others, De novo Design of a Non-local  
350  $\beta$ -sheet Protein with High Stability and Accuracy. *Nat. Struct. Mol. Biol.* **2018**, 25, 1028.
- 351 3. Chiti, F.; Dobson, C. M., Protein Misfolding, Amyloid Formation, and Human Disease: a  
352 Summary of Progress Over the Last Decade. *Annu. Rev. Biochem.* **2017**, 86, 27-68.
- 353 4. Richardson, J. S.; Richardson, D. C., Natural  $\beta$ -sheet Proteins Use Negative Design to  
354 Avoid Edge-to-edge Aggregation. *Proc. Natl. Acad. Sci. U.S.A.* **2002**, 99, 2754-2759.
- 355 5. Colletier, J.-P.; Laganowsky, A.; Landau, M.; Zhao, M.; Soriaga, A. B.; Goldschmidt, L.;  
356 Flot, D.; Cascio, D.; Sawaya, M. R.; Eisenberg, D., Molecular Basis for Amyloid- $\beta$   
357 Polymorphism. *Proc. Natl. Acad. Sci. U.S.A.* **2011**, 108, 16938-16943.

- 358 6. Liu, C.; Zhao, M.; Jiang, L.; Cheng, P.-N.; Park, J.; Sawaya, M. R.; Pensalfini, A.; Gou,  
359 D.; Berk, A. J.; Glabe, C. G.; others, Out-of-register  $\beta$ -sheets Suggest a Pathway to Toxic  
360 Amyloid Aggregates. *Proc. Natl. Acad. Sci. U.S.A.* **2012**, 109, 20913-20918.
- 361 7. Matthes, D.; Daebel, V.; Meyenberg, K.; Riedel, D.; Heim, G.; Diederichsen, U.; Lange,  
362 A.; de Groot, B. L., Spontaneous Aggregation of the Insulin-derived Steric Zipper Peptide  
363 VEALYL Results in Different Aggregation Forms with Common Features. *J. Mol. Biol.* **2014**,  
364 426, 362-376.
- 365 8. Giorgetti, S.; Greco, C.; Tortora, P.; Aprile, F., Targeting Amyloid Aggregation: an  
366 Overview of Strategies and Mechanisms. *Int. J. Mol. Sci.* **2018**, 19, 2677.
- 367 9. Huang, P.-S.; Boyken, S. E.; Baker, D., The Coming of Age of De novo Protein Design.  
368 *Nature* **2016**, 537, 320.
- 369 10. Dou, J.; Vorobieva, A. A.; Sheffler, W.; Doyle, L. A.; Park, H.; Bick, M. J.; Mao, B.;  
370 Foight, G. W.; Lee, M. Y.; Gagnon, L. A.; others, De novo Design of a Fluorescence-activating  
371  $\beta$ -barrel. *Nature* **2018**, 561, 485.
- 372 11. Jang, H.; Arce, F. T.; Lee, J.; Gillman, A. L.; Ramachandran, S.; Kagan, B. L.; Lal, R.;  
373 Nussinov, R. Computational Methods for Structural and Functional Studies of Alzheimer's  
374 Amyloid Ion Channels. In *Protein Amyloid Aggregation*; Springer: 2016, pp 251-268.
- 375 12. Dovidchenko, N. V.; Galzitskaya, O. V. Computational Approaches to Identification of  
376 Aggregation Sites and the Mechanism of Amyloid Growth. In *Lipids in Protein Misfolding*;  
377 Springer: 2015, pp 213-239.
- 378 13. Zheng, W.; Tsai, M.-Y.; Chen, M.; Wolynes, P. G., Exploring the Aggregation Free  
379 Energy Landscape of the Amyloid- $\beta$  Protein (1-40). *Proc. Natl. Acad. Sci. U.S.A.* **2016**, 113,  
380 11835-11840.
- 381 14. Mandel-Gutfreund, Y.; Zaremba, S. M.; Gregoret, L. M., Contributions of Residue  
382 Pairing to  $\beta$ -sheet Formation: Conservation and Covariation of Amino Acid Residue Pairs on  
383 Antiparallel  $\beta$ -strands. *J. Mol. Biol.* **2001**, 305, 1145-1159.
- 384 15. Steward, R. E.; Thornton, J. M., Prediction of Strand Pairing in Antiparallel and Parallel  
385  $\beta$ -sheets Using Information Theory. *Proteins* **2002**, 48, 178-191.
- 386 16. Fernandez-Escamilla, A.-M.; Rousseau, F.; Schymkowitz, J.; Serrano, L., Prediction of  
387 Sequence-dependent and Mutational Effects on the Aggregation of Peptides and Proteins. *Nat.*  
388 *Biotechnol.* **2004**, 22, 1302.
- 389 17. Trovato, A.; Chiti, F.; Maritan, A.; Seno, F., Insight into the Structure of Amyloid Fibrils  
390 from the Analysis of Globular Proteins. *PLOS Comput. Biol.* **2006**, 2, 170.
- 391 18. Zibae, S.; Makin, O. S.; Goedert, M.; Serpell, L. C., A Simple Algorithm Locates  $\beta$ -  
392 strands in the Amyloid Fibril Core of  $\alpha$ -synuclein, A $\beta$ , and Tau Using the Amino Acid Sequence  
393 Alone. *Protein Sci.* **2007**, 16, 906-918.

- 394 19. Bryan Jr, A. W.; Menke, M.; Cowen, L. J.; Lindquist, S. L.; Berger, B., BETASCAN:  
395 Probable  $\beta$ -Amyloids Identified by Pairwise Probabilistic Analysis. *PLOS Comput. Biol.* **2009**, *5*,  
396 1000333.
- 397 20. Maurer-Stroh, S.; Debulpaep, M.; Kuemmerer, N.; De La Paz, M. L.; Martins, I. C.;  
398 Reumers, J.; Morris, K. L.; Copland, A.; Serpell, L.; Serrano, L.; others, Exploring the Sequence  
399 Determinants of Amyloid Structure Using Position-specific Scoring Matrices. *Nat. Methods*  
400 **2010**, *7*, 237.
- 401 21. Tartaglia, G. G.; Vendruscolo, M., The Zyggregator Method for Predicting Protein  
402 Aggregation Propensities. *Chem. Soc. Rev.* **2008**, *37*, 1395-1401.
- 403 22. Kim, C.; Choi, J.; Lee, S. J.; Welsh, W. J.; Yoon, S., NetCSSP: Web Application for  
404 Predicting Chameleon Sequences and Amyloid Fibril Formation. *Nucleic Acids Res.* **2009**, *37*,  
405 469.
- 406 23. Tsolis, A. C.; Papandreou, N. C.; Iconomidou, V. A.; Hamodrakas, S. J., A Consensus  
407 Method for the Prediction of 'Aggregation-prone' Peptides in Globular Proteins. *PLOS One* **2013**,  
408 *8*, 54175.
- 409 24. Kortemme, T.; Ramírez-Alvarado, M.; Serrano, L., Design of a 20-amino Acid, Three-  
410 Stranded  $\beta$ -sheet Protein. *Science* **1998**, *281*, 253-256.
- 411 25. Minor Jr, D. L.; Kim, P. S., Measurement of the  $\beta$ -sheet-forming Propensities of Amino  
412 Acids. *Nature* **1994**, *367*, 660.
- 413 26. Quinn, T. P.; Tweedy, N. B.; Williams, R. W.; Richardson, J. S.; Richardson, D. C.,  
414 Betadoublet: De novo Design, Synthesis, and Characterization of a Beta-sandwich Protein. *Proc.*  
415 *Natl. Acad. Sci. U.S.A.* **1994**, *91*, 8747-8751.
- 416 27. Stranges, P. B.; Machius, M.; Miley, M. J.; Tripathy, A.; Kuhlman, B., Computational  
417 Design of a Symmetric Homodimer Using  $\beta$ -strand Assembly. *Proc. Natl. Acad. Sci. U.S.A.*  
418 **2011**, *108*, 20562-20567.
- 419 28. Hu, X.; Wang, H.; Ke, H.; Kuhlman, B., Computer-based Redesign of a  $\beta$  sandwich  
420 Protein Suggests That Extensive Negative Design Is Not Required for De novo  $\beta$  sheet Design.  
421 *Structure* **2008**, *16*, 1799-1805.
- 422 29. Shammass, S. L.; Knowles, T. P.; Baldwin, A. J.; MacPhee, C. E.; Welland, M. E.;  
423 Dobson, C. M.; Devlin, G. L., Perturbation of the Stability of Amyloid Fibrils Through  
424 Alteration of Electrostatic Interactions. *Biophys. J.* **2011**, *100*, 2783-2791.
- 425 30. Wang, W.; Hecht, M. H., Rationally Designed Mutations Convert De novo Amyloid-like  
426 Fibrils into Monomeric  $\beta$ -sheet Proteins. *Proc. Natl. Acad. Sci. U.S.A.* **2002**, *99*, 2760-2765.
- 427 31. West, M. W.; Wang, W.; Patterson, J.; Mancias, J. D.; Beasley, J. R.; Hecht, M. H., De  
428 novo Amyloid Proteins from Designed Combinatorial Libraries. *Proc. Natl. Acad. Sci.* **1999**, *96*,  
429 11211-11216.

- 430 32. Gallardo, R.; Ramakers, M.; De Smet, F.; Claes, F.; Khodaparast, L.; Khodaparast, L.;  
431 Couceiro, J. R.; Langenberg, T.; Siemons, M.; Nyström, S.; others, De novo Design of a  
432 Biologically Active Amyloid. *Science* **2016**, 354, 4949.
- 433 33. Fujiwara, K.; Toda, H.; Ikeguchi, M., Dependence of  $\alpha$ -helical and  $\beta$ -sheet Amino Acid  
434 Propensities on the Overall Protein Fold Type. *BMC Struct. Biol.* **2012**, 12, 18.
- 435 34. Hutchinson, E. G.; Sessions, R. B.; Thornton, J. M.; Woolfson, D. N., Determinants of  
436 Strand Register in Antiparallel  $\beta$ -sheets of Proteins. *Protein Sci.* **1998**, 7, 2287-2300.
- 437 35. Marcos, E.; Silva, D.-A., Essentials of De novo Protein Design: Methods and  
438 Applications. *Wiley Interdiscip. Rev. Comput. Mol. Sci.* **2018**, 8, 1374.
- 439 36. Sormanni, P.; Aprile, F. A.; Vendruscolo, M., Rational Design of Antibodies Targeting  
440 Specific Epitopes Within Intrinsically Disordered Proteins. *Proc. Natl. Acad. Sci. U.S.A.* **2015**,  
441 112, 9902-9907.
- 442 37. Cabantous, S.; Terwilliger, T. C.; Waldo, G. S., Protein Tagging and Detection with  
443 Engineered Self-assembling Fragments of Green Fluorescent Protein. *Nat. Biotechnol.* **2005**, 23,  
444 102.
- 445 38. Wang, G.; Dunbrack Jr, R. L., PISCES: a Protein Sequence Culling Server.  
446 *Bioinformatics* **2003**, 19, 1589-1591.
- 447 39. Zhang, Y.; Skolnick, J., TM-align: a Protein Structure Alignment Algorithm Based on the  
448 TM-score. *Nucleic Acids Res.* **2005**, 33, 2302-2309.
- 449 40. Hubbard, T. J. Use of  $\beta$ -strand Interaction Pseudo-Potentials in Protein Structure  
450 Prediction and Modeling. In Proceedings of the Hawaii International Conference on System  
451 Sciences, 1994; 1994; Vol. 27; pp 336-336.
- 452 41. Cerf, E.; Sarroukh, R.; Tamamizu-Kato, S.; Breydo, L.; Derclaye, S.; Dufrière, Y. F.;  
453 Narayanaswami, V.; Goormaghtigh, E.; Ruyschaert, J.-M.; Raussens, V., Antiparallel  $\beta$ -Sheet: a  
454 Signature Structure of the Oligomeric Amyloid- $\beta$  Peptide. *Biochem. J.* **2009**, 421, 415-423.
- 455 42. Gordon, D. J.; Balbach, J. J.; Tycko, R.; Meredith, S. C., Increasing the Amphiphilicity of  
456 an Amyloidogenic Peptide Changes the  $\beta$ -sheet Structure in the Fibrils From Antiparallel to  
457 Parallel. *Biophys. J.* **2004**, 86, 428-434.
- 458 43. Choi, Y.; Deane, C. M., FREAD Revisited: Accurate Loop Structure Prediction Using a  
459 Database Search Algorithm. *Proteins* **2010**, 78, 1431-1440.
- 460 44. Mizuguchi, K.; Deane, C. M.; Blundell, T. L.; Overington, J. P., HOMSTRAD: a  
461 Database of Protein Structure Alignments for Homologous Families. *Protein Sci.* **1998**, 7, 2469-  
462 2471.

- 463 45. Kim, Y. E.; Kim, Y.-n.; Kim, J. A.; Kim, H. M.; Jung, Y., Green Fluorescent Protein  
464 Nanopolygons as Monodisperse Supramolecular Assemblies of Functional Proteins with Defined  
465 Valency. *Nat. Commun.* **2015**, 6, 7134.
- 466 46. McCoy, K.; Douglas, T. In vivo Packaging of Protein Cargo Inside of Virus-Like Particle  
467 P22. In *Virus-Derived Nanoparticles for Advanced Technologies*; Springer: 2018, pp 295-302.
- 468 47. Zaremba, S. M.; Gregoret, L. M., Context-dependence of Amino Acid Residue Pairing in  
469 Antiparallel  $\beta$ -Sheets. *J. Mol. Biol.* **1999**, 291, 463-479.
- 470 48. Allen, M.; Poggiali, D.; Whitaker, K.; Marshall, T. R.; Kievit, R., Raincloud Plots: a  
471 Multi-Platform Tool For Robust Data Visualization. *PeerJ* **2018**, 6, 27137.
- 472 49. Alford, R. F.; Leaver-Fay, A.; Jeliazkov, J. R.; O'Meara, M. J.; DiMaio, F. P.; Park, H.;  
473 Shapovalov, M. V.; Renfrew, P. D.; Mulligan, V. K.; Kappel, K.; others, The Rosetta All-atom  
474 Energy Function for Macromolecular Modeling and Design. *J. Chem. Theory Comput.* **2017**, 13,  
475 3031-3048.
- 476 50. Kuhlman, B.; Dantas, G.; Ireton, G. C.; Varani, G.; Stoddard, B. L.; Baker, D., Design of  
477 a Novel Globular Protein Fold with Atomic-level Accuracy. *Science* **2003**, 302, 1364-1368.
- 478 51. Schymkowitz, J. W.; Rousseau, F.; Martins, I. C.; Ferkinghoff-Borg, J.; Stricher, F.;  
479 Serrano, L., Prediction of Water and Metal Binding Sites and Their Affinities by Using the Fold-  
480 X Force Field. *Proc. Natl. Acad. Sci. U.S.A.* **2005**, 102, 10147-10152.
- 481 52. Fleishman, S. J.; Whitehead, T. A.; Ekiert, D. C.; Dreyfus, C.; Corn, J. E.; Strauch, E.-  
482 M.; Wilson, I. A.; Baker, D., Computational Design of Proteins Targeting the Conserved Stem  
483 Region of Influenza Hemagglutinin. *Science* **2011**, 332, 816-821.
- 484 53. Rocklin, G. J.; Chidyausiku, T. M.; Goreshnik, I.; Ford, A.; Houliston, S.; Lemak, A.;  
485 Carter, L.; Ravichandran, R.; Mulligan, V. K.; Chevalier, A.; others, Global Analysis of Protein  
486 Folding Using Massively Parallel Design, Synthesis, and Testing. *Science* **2017**, 357, 168-175.
- 487 54. Walsh, I.; Seno, F.; Tosatto, S. C.; Trovato, A., PASTA 2.0: an Improved Server for  
488 Protein Aggregation Prediction. *Nucleic Acids Res.* **2014**, 42, 301.
- 489 55. Tyka, M. D.; Keedy, D. A.; André, I.; DiMaio, F.; Song, Y.; Richardson, D. C.;  
490 Richardson, J. S.; Baker, D., Alternate States of Proteins Revealed by Detailed Energy  
491 Landscape Mapping. *J. Mol. Biol.* **2011**, 405, 607-618.
- 492 56. Köker, T.; Fernandez, A.; Pinaud, F., Characterization of Split Fluorescent Protein  
493 Variants and Quantitative Analyses of Their Self-Assembly Process. *Sci. Rep.* **2018**, 8, 5344.
- 494 57. Ito, M.; Ozawa, T.; Takada, S., Folding Coupled with Assembly in Split Green  
495 Fluorescent Proteins Studied by Structure-based Molecular Simulations. *J. Phys. Chem. B* **2013**,  
496 117, 13212-13218.



- 497 58. Xu, Y.; Shen, J.; Luo, X.; Zhu, W.; Chen, K.; Ma, J.; Jiang, H., Conformational  
498 Transition of Amyloid  $\beta$ -peptide. *Proc. Natl. Acad. Sci. U.S.A.* **2005**, 102, 5403-5407.
- 499 59. Miller, K. E.; Kim, Y.; Huh, W.-K.; Park, H.-O., Bimolecular Fluorescence  
500 Complementation (BiFC) Analysis: Advances and Recent Applications for Genome-wide  
501 Interaction Studies. *J. Mol. Biol.* **2015**, 427, 2039-2055.

502

503

504 **For Table of Contents Use Only**

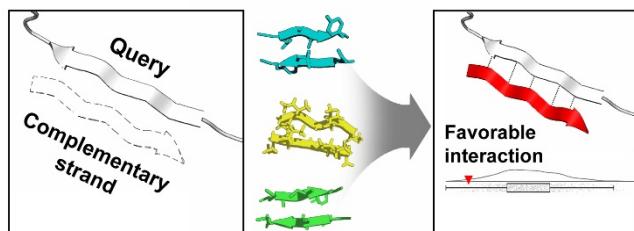

505
